# Supplementary material for: First-line treatment for patients with advanced non-small cell lung carcinoma and high PD-L1 expression: pembrolizumab or pembrolizumab plus chemotherapy
Source: PubMed Central journal article supplement (PMC6500047; doi:10.1186/s40425-019-0600-6), 2019-05-03

## Supplemental Methods

### Search strategies and number of studies yielded from each database.

Pubmed: 75 Results

```
((("Carcinoma, Non-Small-Cell Lung"[Mesh]) OR (((NSCLC[Title/Abstract] OR "Non Small Cell"[Title/Abstract] OR "Non-Small-Cell"[Title/Abstract] OR "Non-Small Cell"[Title/Abstract] OR "Non-Small Cell"[Title/Abstract]))) AND lung[Title/Abstract])) AND (("pembrolizumab" [Supplementary Concept] OR "lambrolizumab"[Title/Abstract] OR "Keytruda"[Title/Abstract] OR "MK-3475"[Title/Abstract])) AND ((("clinical trials as topic"[MeSH Terms] OR "trial"[Title/Abstract] OR "study"[Title/Abstract])))
```

EMbase: 106 Results

```
('pembrolizumab'/exp OR 'lambrolizumab':ab,ti OR 'Keytruda':ab,ti OR 'MK-3475':ab,ti) AND (('non small cell lung cancer'/exp OR ('lung':ab,ti AND ('NSCLC':ab,ti OR 'Non Small Cell':ab,ti OR 'Non-Small-Cell':ab,ti OR 'Non-Small Cell':ab,ti OR 'Non-Small Cell':ab,ti))) AND ('randomized controlled trial'/exp))
```

Cochrane: 162 results, 158 trials

#1 MeSH descriptor: [Carcinoma, Non-Small-Cell Lung] explode all trees

#2 "lung" AND ("Non Small Cell" OR "Non-Small Cell" OR "Non-Small-Cell")

#3 "pembrolizumab" or "lambrolizumab" or "Keytruda" or "MK-3475"

# 4 (#1 OR #2) AND #3

**Supplemental Table 1. Quality assessment: risk of bias by Cochrane Collaboration's tool**

| Trial                  | Sequence generation | Allocation Concealment        | Blinding                                 | Incomplete outcome data | Selective reporting                   | Other source of bias                               |
|------------------------|---------------------|-------------------------------|------------------------------------------|-------------------------|---------------------------------------|----------------------------------------------------|
| KEYNOTE-021 2016, 2018 | Adequate            | Adequate (Central allocation) | Adequate (Independent Radiologic review) | Adequate                | Inadequate (PFS, OS was not reported) |                                                    |
| KEYNOTE-189 2018       | Adequate            | Adequate (Central allocation) | Adequate (Independent Radiologic review) | Adequate                | Adequate                              |                                                    |
| KEYNOTE-407 2018       | Adequate            | Adequate (Central allocation) | Adequate (Independent Radiologic review) | Adequate                | Adequate                              |                                                    |
| KEYNOTE-024 2016, 2017 | Adequate            | Adequate (Central allocation) | Adequate (Independent Radiologic review) | Adequate                | Adequate                              |                                                    |
| KEYNOTE-042 2018       | Adequate            | Adequate (Central allocation) | Adequate (Independent Radiologic review) | Adequate                | Adequate                              | Data from the abstract and the presentation slides |

**Supplemental Figure 1. Trial Selection Process**

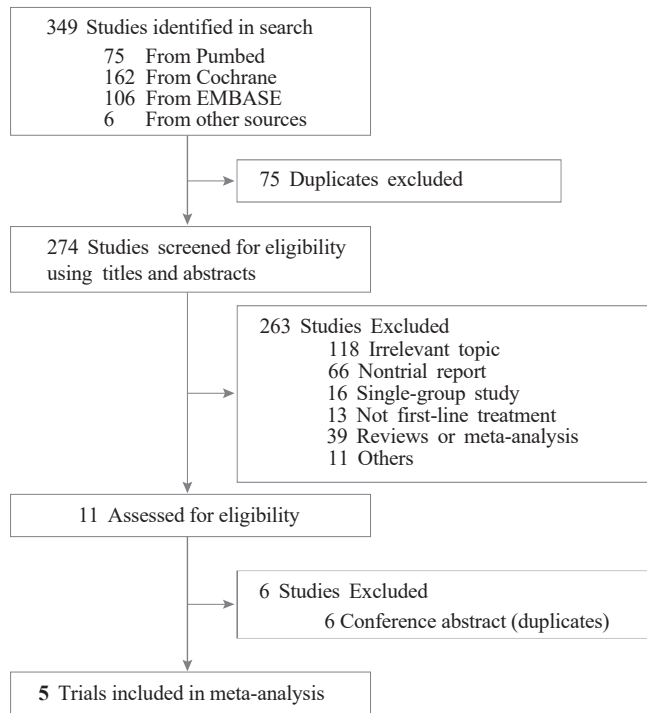

Supplement: 40425_2019_600_MOESM1_ESM.pdf [file 40425_2019_600_MOESM1_ESM.pdf]
